# Supplementary material
Source: publisher figshare collection journal article supplement (https://sage.figshare.com/ndownloader/files/19146302)
Supplement: Supplementary file 1 [file 19146302]

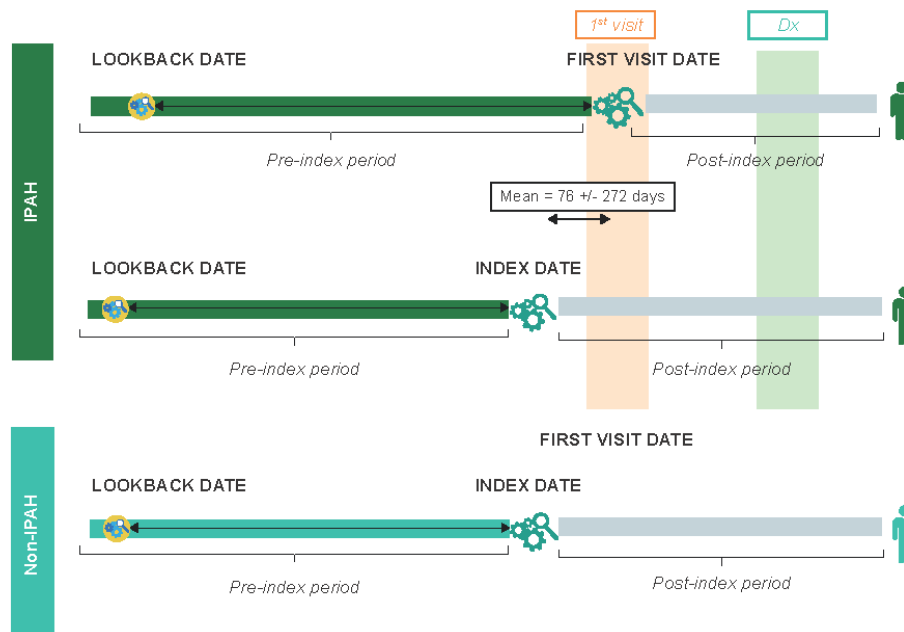

**Supplementary Figure 1:** Graphical representation of the patient history window considered in the predictive model for each cohort.

Dx, diagnosis; iPAH, idiopathic pulmonary arterial hypertension

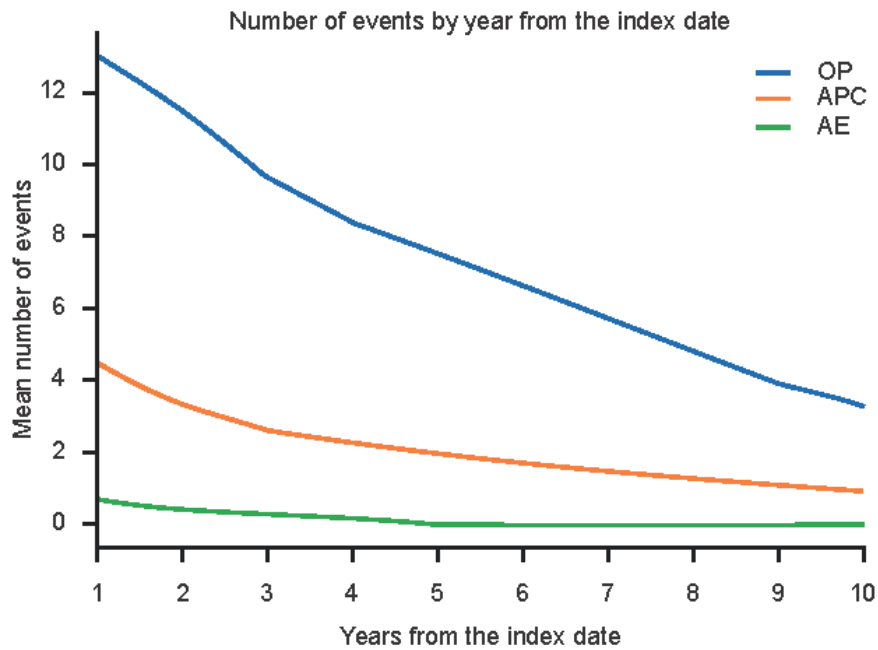

**Supplementary Figure 2: Mean number of events by year prior to the index date, for each HES table, for the iPAH cohort. APC table = inpatient records; OP table = outpatient records; A&E table = accident and emergency records.**

HES, Hospital **Episode Statistics**; iPAH, idiopathic pulmonary arterial hypertension.



**Supplementary Table 1: ICD-10 codes for the definition of the non-iPAH cohort dataset**

| Detail |                                                                                                                                             |
|--------|---------------------------------------------------------------------------------------------------------------------------------------------|
| I420   | Dilated cardiomyopathy                                                                                                                      |
| E039   | Hypothyroidism, unspecified                                                                                                                 |
| I050   | Rheumatic mitral stenosis                                                                                                                   |
| I342   | Nonrheumatic mitral (valve) stenosis                                                                                                        |
| Q232   | Congenital mitral stenosis                                                                                                                  |
| M351   | Other overlap syndromes                                                                                                                     |
| G473   | Sleep apnoea                                                                                                                                |
| M32    | Systemic lupus erythematosus (SLE)                                                                                                          |
| K766   | Portal hypertension                                                                                                                         |
| I370   | Nonrheumatic pulmonary valve stenosis                                                                                                       |
| L940   | Localized scleroderma [morphea]                                                                                                             |
| L941   | Linear scleroderma                                                                                                                          |
| M43    | Spondylolysis                                                                                                                               |
| I20    | Angina pectoris                                                                                                                             |
| I21    | ST elevation (STEMI) and non-ST elevation (NSTEMI) myocardial infarction                                                                    |
| I22    | Subsequent ST elevation (STEMI) and non-ST elevation (NSTEMI) myocardial infarction                                                         |
| I23    | Certain current complications following ST elevation (STEMI) and non-ST elevation (NSTEMI) myocardial infarction (within the 28 day period) |
| I24    | Other acute ischaemic heart diseases                                                                                                        |
| I25    | Chronic ischaemic heart disease                                                                                                             |
| I26    | Pulmonary embolism                                                                                                                          |

|      |                                               |
|------|-----------------------------------------------|
| I27  | Other pulmonary heart diseases                |
| I28  | Other diseases of pulmonary vessels           |
| I50  | Heart failure                                 |
| J40  | Bronchitis, not specified as acute or chronic |
| J41  | Simple and mucopurulent chronic bronchitis    |
| J42  | Unspecified chronic bronchitis                |
| J43  | Emphysema                                     |
| J44  | Other chronic obstructive pulmonary disease   |
| J45  | Asthma                                        |
| J47  | Bronchiectasis                                |
| J849 | Interstitial pulmonary disease, unspecified   |

---

ICD-10, International Statistical Classification of Diseases and Related Health Problems,

10th Revision; iPAH, idiopathic pulmonary arterial hypertension.

**Supplementary Table 2:** Baseline characteristics of patients with and without confirmed diagnosis of idiopathic pulmonary arterial hypertension.

|                                      | All patients<br>(n=709) | Patients with<br>iPAH < 50 years<br>(n=172) | Patients with<br>iPAH ≥ 50<br>years<br>(n=537) | Patients<br>without iPAH<br>(n=2,812,458) |
|--------------------------------------|-------------------------|---------------------------------------------|------------------------------------------------|-------------------------------------------|
| <b>Demographics</b>                  |                         |                                             |                                                |                                           |
| Age (years)                          | 60 (23)                 | 38 (16)                                     | 66 (13)                                        | 71 (23)                                   |
| Gender (% female)                    | 62                      | 70                                          | 60                                             | 51                                        |
| <b>Comorbidities</b>                 |                         |                                             |                                                |                                           |
| Systemic hypertension<br>(%)         | 48                      | 20                                          | 59                                             | 60                                        |
| Atrial fibrillation / flutter<br>(%) | 17                      | 4                                           | 22                                             | 37                                        |
| Ischaemic heart disease<br>(%)       | 8                       | *                                           | 11                                             | 18                                        |

\*Due to NHS Digital's reporting policy of small numbers (n<5), the percentage of patients by age group has been masked to main patient confidentiality; Values are median (interquartile range) or percentage, unless otherwise indicated. Age is reported at index date; co-morbidities are summarised over the observation window prior to the index date.

iPAH, idiopathic pulmonary arterial hypertension; NHS, National Health Service.

**Supplementary Table 3:** Baseline characteristics of patients with idiopathic pulmonary arterial hypertension.

|                                                | All patients<br>(n=709) | Patients < 50 years<br>(n=172) | Patients ≥ 50<br>years (n=537) |
|------------------------------------------------|-------------------------|--------------------------------|--------------------------------|
| <b>Demographics</b>                            |                         |                                |                                |
| Age (years)                                    | 60 (17)                 | 36 (9)                         | 68 (9)                         |
| Gender (% , Female)                            | 62                      | 70                             | 60                             |
| <b>Right heart catheter</b>                    |                         |                                |                                |
| RAP (mmHg)                                     | 12 (6)                  | 12 (7)                         | 12 (6)                         |
| mPAP(mmHg)                                     | 53 (12)                 | 57 (13)                        | 51 (11)                        |
| CI (L/min/m <sup>2</sup> )                     | 2.4 (0.8)               | 2.6 (0.9)                      | 2.3 (0.7)                      |
| PCWP (mmHg)                                    | 12 (5)                  | 11 (4)                         | 13 (5)                         |
| PVR (Wood Units)                               | 833 (399)               | 914 (438)                      | 810 (385)                      |
| SvO <sub>2</sub> (%)                           | 60 (9)                  | 62 (10)                        | 60 (8)                         |
| <b>Lung function and<br/>exercise capacity</b> |                         |                                |                                |
| FEV <sub>1</sub> (absolute)                    | 1.9 (0.7)               | 2.4 (0.8)                      | 1.7 (0.6)                      |
| FVC (absolute)                                 | 2.7 (1.0)               | 3.2 (1.0)                      | 2.6 (0.9)                      |
| FEV <sub>1</sub> /FVC ratio                    | 0.94 (0.24)             | 0.95 (0.22)                    | 0.94 (0.24)                    |
| DL <sub>CO</sub> (absolute)                    | 3.5 (2.2)               | 5.7 (2.3)                      | 2.9 (1.7)                      |
| ISWD (m)                                       | 166 (177)               | 293 (205)                      | 129 (149)                      |
| <b>Comorbidities</b>                           |                         |                                |                                |
| Systemic hypertension<br>(%)                   | 54                      | 18                             | 65                             |

|                                 |             |             |             |
|---------------------------------|-------------|-------------|-------------|
| Atrial fibrillation/flutter     | 21          | 4           | 26          |
| (%)                             |             |             |             |
| Ischaemic heart disease         | 11          | *           | >10*        |
| (%)                             |             |             |             |
| <b>HCRU events in period up</b> | <b>18.7</b> | <b>14.4</b> | <b>19.7</b> |
| <b>to 3 years pre-diagnosis</b> |             |             |             |
| <b>(n)</b>                      |             |             |             |

CI, cardiac index; DL<sub>CO</sub>, diffusing capacity of lung for carbon monoxide; FEV<sub>1</sub>, forced expiratory volume in one second; FVC, forced vital capacity; ICD-10, International Statistical Classification of Diseases and Related Health Problems, 10<sup>th</sup> Revision; iPAH, idiopathic pulmonary arterial hypertension; ISWD, incremental shuttle walk distance; mPAP, mean pulmonary arterial pressure; n, number of patients; PCWP, pulmonary capillary wedge pressure; PVR, pulmonary vascular resistance; RAP, right atrial pressure; SvO<sub>2</sub>, mixed venous oxygen saturation.

Data from right heart catheterisation within 3 months are presented; Lung function data and exercise capacity as assessed by a formal test are presented within 3 months of diagnosis; Comorbidities identified from ICD-10 codes are presented; Index date is defined as the first event for which a patient is referred to a cardiology, respiratory medicine or neurology specialist in Sheffield; Due to National Health Service Digital's reporting policy of small numbers (n<5), the percentage of patients by age group has been masked to main patient confidentiality (represented by \*); Values are mean (standard deviation) or percentage, unless otherwise indicated. Detailed diagnostic characteristics of iPAH Patients were included in the descriptive analysis but not in the machine learning algorithm.



**Supplementary Table 4:** Codes and diagnoses.

| <b>Code</b> | <b>HES field</b> | <b>Description</b>                                     |
|-------------|------------------|--------------------------------------------------------|
| D751        | Primary ICD-10   | D751: Secondary polycythaemia                          |
| I270        | Primary ICD-10   | I270: Primary pulmonary hypertension                   |
| I272        | Primary ICD-10   | I272: Other secondary pulmonary hypertension           |
| I279        | Primary ICD-10   | I279: Pulmonary heart disease unspecified              |
| I471        | Primary ICD-10   | I471: Supraventricular tachycardia                     |
| I48X        | Primary ICD-10   | I48X: Atrial fibrillation and flutter                  |
| I500        | Primary ICD-10   | I500: Congestive heart failure                         |
| I509        | Primary ICD-10   | I509: Heart failure unspecified                        |
| I517        | Primary ICD-10   | I517: Cardiomegaly                                     |
| J459        | Primary ICD-10   | J459: Asthma unspecified                               |
| J849        | Primary ICD-10   | J849: Interstitial pulmonary disease unspecified       |
| J90X        | Primary ICD-10   | J90X: Pleural effusion not elsewhere classified        |
| M349        | Primary ICD-10   | M349: Systemic sclerosis unspecified                   |
| Q211        | Primary ICD-10   | Q211: Atrial septal defect                             |
| R05X        | Primary ICD-10   | R05X: Cough                                            |
| R060        | Primary ICD-10   | R060: Dyspnoea                                         |
| R068        | Primary ICD-10   | R068: Other and unspecified abnormalities of breathing |
| R072        | Primary ICD-10   | R072: Precordial pain                                  |
| R073        | Primary ICD-10   | R073: Other chest pain                                 |
| R074        | Primary ICD-10   | R074: Chest pain unspecified                           |
| R42X        | Primary ICD-10   | R42X: Dizziness and giddiness                          |
| R55X        | Primary ICD-10   | R55X: Syncope and collapse                             |

|      |                    |                                                       |
|------|--------------------|-------------------------------------------------------|
| R91X | Primary ICD-10     | R91X: Abnormal findings on diagnostic imaging of lung |
| U082 | Primary OCPS codes | U082: Ultrasound of abdomen                           |
| U106 | Primary OCPS codes | U106: Myocardial perfusion scan                       |
| U112 | Primary OCPS codes | U112: Doppler ultrasound of vessels of extremities    |
| E921 | Primary OPCS codes | E921: Carbon monoxide transfer factor test            |
| E924 | Primary OPCS codes | E924: Blood gas analysis                              |
| E925 | Primary OPCS codes | E925: Complex lung function exercise test             |
| E926 | Primary OPCS codes | E926: Simple lung function exercise test              |
| E931 | Primary OPCS codes | E931: Measurement of peak expiratory flow rate        |
| E932 | Primary OPCS codes | E932: Spirometry                                      |
| E935 | Primary OPCS codes | E935: Measurement of static lung volume               |
|      |                    | K631: Angiocardiology of combination of right and     |
| K631 | Primary OPCS codes | left side of heart                                    |
| K652 | Primary OPCS codes | K652: Catheterisation of right side of heart NEC      |
| L133 | Primary OPCS codes | L133: Arteriography of pulmonary artery               |
| U071 | Primary OPCS codes | U071: Computed tomography of chest                    |
| U103 | Primary OPCS codes | U103: Cardiac magnetic resonance imaging              |
| U151 | Primary OPCS codes | U151: Lung perfusion scanning NEC                     |
| U192 | Primary OPCS codes | U192: 24 hour ambulatory electrocardiography          |
| U194 | Primary OPCS codes | U194: Exercise electrocardiography                    |
| U198 | Primary OPCS codes | U198: Other specified diagnostic electrocardiography  |
| U199 | Primary OPCS codes | U199: Unspecified diagnostic electrocardiography      |
| U201 | Primary OPCS codes | U201: Transthoracic echocardiography                  |
| U202 | Primary OPCS codes | U202: Transoesophageal echocardiography               |
| U205 | Primary OPCS codes | U205: Stress echocardiography                         |

|      |                    |                                                       |
|------|--------------------|-------------------------------------------------------|
| U208 | Primary OPCS codes | U208: Other specified diagnostic echocardiography     |
| U209 | Primary OPCS codes | U209: Unspecified diagnostic echocardiography         |
| U354 | Primary OPCS codes | U354: Computed tomography of pulmonary arteries       |
| X821 | Primary OPCS codes | X821: Primary pulmonary hypertension drugs band 1     |
|      |                    | B965: <i>Pseudomonas (aeruginosa)</i> as the cause of |
| B965 | Secondary ICD-10   | diseases classified to other chapters                 |
| D508 | Secondary ICD-10   | D508: Other iron deficiency anaemias                  |
| E039 | Secondary ICD-10   | E039: Hypothyroidism unspecified                      |
| E059 | Secondary ICD-10   | E059: Thyrotoxicosis unspecified                      |
| E877 | Secondary ICD-10   | E877: Fluid overload                                  |
|      |                    | F101: Mental and behavioural disorders due to use of  |
| F101 | Secondary ICD-10   | alcohol harmful use                                   |
|      |                    | F102: Mental and behavioural disorders due to use of  |
| F102 | Secondary ICD-10   | alcohol dependence syndrome                           |
|      |                    | F112: Mental and behavioural disorders due to use of  |
| F112 | Secondary ICD-10   | opioids dependence syndrome                           |
|      |                    | F171: Mental and behavioural disorders due to use of  |
| F171 | Secondary ICD-10   | tobacco harmful use                                   |
|      |                    | F172: Mental and behavioural disorders due to use of  |
| F172 | Secondary ICD-10   | tobacco dependence syndrome                           |
| F329 | Secondary ICD-10   | F329: Depressive episode unspecified                  |
| F412 | Secondary ICD-10   | F412: Mixed anxiety and depressive disorder           |
| F419 | Secondary ICD-10   | F419: Anxiety disorder unspecified                    |
| G473 | Secondary ICD-10   | G473: Sleep apnoea                                    |
| H360 | Secondary ICD-10   | H360: Diabetic retinopathy                            |

|      |                  |                                                         |
|------|------------------|---------------------------------------------------------|
| I071 | Secondary ICD-10 | I071: Tricuspid insufficiency                           |
| I10X | Secondary ICD-10 | I10X: Essential (primary) hypertension                  |
| I258 | Secondary ICD-10 | I258: Other forms of chronic ischaemic heart disease    |
| I270 | Secondary ICD-10 | I270: Primary pulmonary hypertension                    |
| I272 | Secondary ICD-10 | I272: Other secondary pulmonary hypertension            |
| I279 | Secondary ICD-10 | I279: Pulmonary heart disease unspecified               |
| I313 | Secondary ICD-10 | I313: Pericardial effusion (noninflammatory)            |
| I351 | Secondary ICD-10 | I351: Aortic (valve) insufficiency                      |
| I361 | Secondary ICD-10 | I361: Nonrheumatic tricuspid (valve) insufficiency      |
| I451 | Secondary ICD-10 | I451: Other and unspecified right bundle-branch block   |
| I471 | Secondary ICD-10 | I471: Supraventricular tachycardia                      |
| I48X | Secondary ICD-10 | I48X: Atrial fibrillation and flutter                   |
| I500 | Secondary ICD-10 | I500: Congestive heart failure                          |
| I509 | Secondary ICD-10 | I509: Heart failure unspecified                         |
| I517 | Secondary ICD-10 | I517: Cardiomegaly                                      |
| I518 | Secondary ICD-10 | I518: Other ill-defined heart diseases                  |
| I730 | Secondary ICD-10 | I730: Raynaud syndrome                                  |
|      |                  | I839: Varicose veins of lower extremities without ulcer |
| I839 | Secondary ICD-10 | or inflammation                                         |
| J439 | Secondary ICD-10 | J439: Emphysema unspecified                             |
|      |                  | J440: Chronic obstructive pulmonary disease with acute  |
| J440 | Secondary ICD-10 | lower respiratory infection                             |
|      |                  | J441: Chronic obstructive pulmonary disease with acute  |
| J441 | Secondary ICD-10 | exacerbation unspecified                                |
| J449 | Secondary ICD-10 | J449: Chronic obstructive pulmonary disease unspecified |

|      |                  |                                                           |
|------|------------------|-----------------------------------------------------------|
| J459 | Secondary ICD-10 | J459: Asthma unspecified                                  |
| J47X | Secondary ICD-10 | J47X: Bronchiectasis                                      |
| J841 | Secondary ICD-10 | J841: Other interstitial pulmonary diseases with fibrosis |
| J849 | Secondary ICD-10 | J849: Interstitial pulmonary disease unspecified          |
| J960 | Secondary ICD-10 | J960: Acute respiratory failure                           |
| K746 | Secondary ICD-10 | K746: Other and unspecified cirrhosis of liver            |
| K766 | Secondary ICD-10 | K766: Portal hypertension                                 |
| K920 | Secondary ICD-10 | K920: Haematemesis                                        |
| K921 | Secondary ICD-10 | K921: Melaena                                             |
| K922 | Secondary ICD-10 | K922: Gastrointestinal haemorrhage unspecified            |
| L891 | Secondary ICD-10 | L891: Stage II decubitus ulcer                            |
| M329 | Secondary ICD-10 | M329: Systemic lupus erythematosus unspecified            |
| M341 | Secondary ICD-10 | M341: CR(E)ST syndrome                                    |
| M349 | Secondary ICD-10 | M349: Systemic sclerosis unspecified                      |
| M350 | Secondary ICD-10 | M350: Sicca syndrome [Sjögren]                            |
|      |                  | M359: Systemic involvement of connective tissue           |
| M359 | Secondary ICD-10 | unspecified                                               |
| Q210 | Secondary ICD-10 | Q210: Ventricular septal defect                           |
| Q211 | Secondary ICD-10 | Q211: Atrial septal defect                                |
| Q218 | Secondary ICD-10 | Q218: Other congenital malformations of cardiac septa     |
| Q249 | Secondary ICD-10 | Q249: Congenital malformation of heart unspecified        |
| R000 | Secondary ICD-10 | R000: Tachycardia unspecified                             |
| R002 | Secondary ICD-10 | R002: Palpitations                                        |
| R060 | Secondary ICD-10 | R060: Dyspnoea                                            |
| R068 | Secondary ICD-10 | R068: Other and unspecified abnormalities of breathing    |

|      |                      |                                                                                               |
|------|----------------------|-----------------------------------------------------------------------------------------------|
| R073 | Secondary ICD-10     | R073: Other chest pain                                                                        |
| R074 | Secondary ICD-10     | R074: Chest pain unspecified                                                                  |
| R18X | Secondary ICD-10     | R18X: Ascites                                                                                 |
| R42X | Secondary ICD-10     | R42X: Dizziness and giddiness                                                                 |
| R53X | Secondary ICD-10     | R53X: Malaise and fatigue                                                                     |
| R55X | Secondary ICD-10     | R55X: Syncope and collapse                                                                    |
| R609 | Secondary ICD-10     | R609: Oedema unspecified                                                                      |
| R91X | Secondary ICD-10     | R91X: Abnormal findings on diagnostic imaging of lung                                         |
| Z136 | Secondary ICD-10     | Z136: Special screening examination for cardiovascular disorders                              |
| Z867 | Secondary ICD-10     | Z867: Personal history of diseases of the circulatory system                                  |
| Z870 | Secondary ICD-10     | Z870: Personal history of diseases of the respiratory system                                  |
| Z877 | Secondary ICD-10     | Z877: Personal history of congenital malformations deformations and chromosomal abnormalities |
| Z922 | Secondary ICD-10     | Z922: Personal history of long-term (current) use of other medicaments                        |
| Z991 | Secondary ICD-10     | Z991: Dependence on respirator                                                                |
| E921 | Secondary OPCS codes | E921: Carbon monoxide transfer factor test                                                    |
| K633 | Secondary OPCS codes | K633: Angiocardiology of left side of heart NEC                                               |
| K634 | Secondary OPCS codes | K634: Coronary arteriography using two catheters                                              |

|      |                |                                                   |
|------|----------------|---------------------------------------------------|
|      | Secondary OPCS |                                                   |
| K636 | codes          | K636: Coronary arteriography NEC                  |
|      | Secondary OPCS |                                                   |
| K652 | codes          | K652: Catheterisation of right side of heart NEC  |
|      | Secondary OPCS |                                                   |
| K661 | codes          | K661: Cardiotachygraphy                           |
|      | Secondary OPCS |                                                   |
| L133 | codes          | L133: Arteriography of pulmonary artery           |
|      | Secondary OPCS |                                                   |
| U103 | codes          | U103: Cardiac magnetic resonance imaging          |
|      | Secondary OPCS |                                                   |
| U117 | codes          | U117: Magnetic resonance angiography              |
|      | Secondary OPCS |                                                   |
| U151 | codes          | U151: Lung perfusion scanning NEC                 |
|      | Secondary OPCS |                                                   |
| U199 | codes          | U199: Unspecified diagnostic electrocardiography  |
|      | Secondary OPCS |                                                   |
| U201 | codes          | U201: Transthoracic echocardiography              |
|      | Secondary OPCS |                                                   |
| U202 | codes          | U202: Transoesophageal echocardiography           |
|      | Secondary OPCS |                                                   |
| U354 | codes          | U354: Computed tomography of pulmonary arteries   |
|      | Secondary OPCS |                                                   |
| X821 | codes          | X821: Primary pulmonary hypertension drugs band 1 |

Secondary OPCS

X822 codes X822: Primary pulmonary hypertension drugs band 2

Secondary OPCS

X823 codes X823: Primary pulmonary hypertension drugs band 3

Secondary OPCS

Y731 codes Y731: Cardiopulmonary bypass

Secondary OPCS

Z401 codes Z401: Pulmonary artery

CREST, calcinosis, Raynaud's phenomenon, esophageal dysmotility, sclerodactyly, and telangiectasia; ICD-10, the International Statistical Classification of Diseases and Related Health Problems.



**Supplementary Table 5:** Clinical specialty codes included within the model

| <b>Code</b> | <b>Description</b> |
|-------------|--------------------|
| 340         | Respiratory Med    |
| 320         | Cardiology         |
| 300         | G Medicine         |
| 100         | General Surgery    |
| 130         | Ophthalmology      |
| 110         | T&O                |
| 303         | Clin Haem          |
| 120         | ENT                |
| 301         | Gastroenterology   |
|             | RESPIRATORY        |
| 341         | PHYSIOLOGY         |
| 430         | Geriatric Med      |
| 502         | Gynaecology        |
| 101         | Urology            |
| 330         | Dermatology        |
| 400         | Neurology          |
|             | DIAGNOSTIC         |
| 812         | IMAGING            |
|             | Anticoagulant      |
| 324         | Service            |
| 140         | Oral Surgery       |

|     |                      |
|-----|----------------------|
|     | Cardiothoracic       |
| 170 | Surgery              |
| 180 | A&E                  |
| 410 | Rheumatology         |
| 361 | Nephrology           |
| 307 | Diabetic Medicine    |
| 107 | Vascular Surgery     |
| 650 | Physiotherapy        |
| 302 | Endocrinology        |
| 103 | Breast Surgery       |
| 104 | Colorectal Surgery   |
| 304 | Clin Physi           |
| 190 | Anaesthetics         |
| 191 | Pain Mgmt            |
| 160 | Plastic Surgery      |
| 710 | Adult Mental Illness |
| 800 | Clin Oncology        |
| 173 | Thoracic Surgery     |
| 501 | Obstetrics           |
| 150 | Neurosurgery         |
| 653 | Podiatry             |
| 306 | Hepatology           |
| 172 | Cardiac Surgery      |

|     |                  |
|-----|------------------|
|     | Interventional   |
| 811 | Radiology        |
| 141 | Restorative Dent |
|     | Maxillo-Facial   |
| 144 | Surgery          |
| 314 | Rehab            |
| 350 | Inf Diseases     |
|     | Critical Care    |
| 192 | Medicine         |
| 822 | Chem Pathology   |
| 321 | Paed Cardiology  |
| 420 | Paediatrics      |
|     | Gynaecological   |
| 503 | Oncology         |
| 654 | Dietetics        |
| 655 | Orthoptics       |

A&E, accident and emergency; ENT, ear, nose, throat.

**Supplementary Table 6: Profiles of top scored patients at risk of iPAH.** The profiles are presented in terms of the proportion of patients observed to have a particular clinical event across patients predicted to by iPAH in terms of true positives (top 100) and false positives (top 500).

|                                                       | <b>Top 100</b>    | <b>Top 500</b>         |
|-------------------------------------------------------|-------------------|------------------------|
|                                                       | <b>iPAH (true</b> | <b>non-iPAH (false</b> |
|                                                       | <b>positives)</b> | <b>positives)</b>      |
|                                                       | <b>(%)</b>        | <b>(%)</b>             |
| <hr/>                                                 |                   |                        |
| <b>Primary Diagnoses Variables</b>                    |                   |                        |
| Count of primary ICD codes within 12 months           | Suppressed        | 0.082                  |
| Count of primary ICD codes 12 months prior            | Suppressed        | 0.02                   |
| R068: Other and unspecific abnormalities of breathing | Suppressed        | Suppressed             |
| R060: Dyspnoea                                        | Suppressed        | 0.05                   |
| I279: Pulmonary heart disease unspecified             | Suppressed        | Suppressed             |
| R074: Chest pain unspecified                          | Suppressed        | 0.026                  |
| J459: Asthma unspecified                              | Suppressed        | Suppressed             |
| I500: Congestive heart failure                        | Suppressed        | 0.032                  |
| I48X: Atrial fibrillation and flutter                 | Suppressed        | Suppressed             |
| <hr/>                                                 |                   |                        |
| <b>Secondary diagnoses variables</b>                  |                   |                        |
| I071: Tricuspid insufficiency                         | 0.08              | 0.134                  |
| I10X: Essential (primary) hypertension                | 0.16              | 0.332                  |
| I517: Cardiomegaly                                    | 0.13              | 0.236                  |
| I500: Congestive heart failure                        | 0.07              | 0.178                  |

|                                                                          |            |       |
|--------------------------------------------------------------------------|------------|-------|
| Count of secondary ICD codes within 12 months                            | 0.54       | 0.776 |
| I48X: Atrial fibrillation and flutter                                    | Suppressed | 0.084 |
| F171: Mental and behavioural disorders due to use of tobacco harmful use | Suppressed | 0.03  |
| Z867: Personal history of diseases of the circulatory system             | Suppressed | 0.142 |
| J459: Asthma unspecified                                                 | 0.08       | 0.076 |
| Count of secondary ICD codes 12 months prior                             | 0.11       | 0.354 |
| J449: Chronic obstructive pulmonary disease unspecified                  | Suppressed | 0.124 |
| R060: Dyspnoea                                                           | 0.06       | 0.058 |
| I361: Nonrheumatic tricuspid (value) insufficiency                       | Suppressed | 0.074 |
| G473: Sleep apnea                                                        | Suppressed | 0.048 |
| J841: Other interstitial pulmonary diseases with fibrosis                | Suppressed | 0.122 |

---

### Speciality visits

|                                                   |            |       |
|---------------------------------------------------|------------|-------|
| Respiratory med                                   | 0.44       | 0.68  |
| Cardiology                                        | 0.77       | 0.75  |
| G Medicine                                        | 0.58       | 0.686 |
| Clin haem                                         | 0.16       | 0.204 |
| Count of speciality visits within 12 months       | 1          | 0.998 |
| A&E                                               | Suppressed | 0.042 |
| Geriatric Med                                     | 00.06      | 0.09  |
| Count of speciality visits within 12 months prior | 0.68       | 0.636 |
| Gastroenterology                                  | 0.06       | 0.156 |

|                        |            |       |
|------------------------|------------|-------|
| Gynaecology            | 0.21       | 0.084 |
| General surgery        | 0.18       | 0.174 |
| Respiratory physiology | Suppressed | 0.096 |
| Clin oncology          | Suppressed | 0.032 |
| ENT                    | 0.1        | 0.128 |
| Anticoagulant service  | Suppressed | 0.068 |

---

An entry was suppressed if it appeared in less than 5 patients.

A&E, accident and emergency; ENT, ear, nose, and throat; G Medicine, general medicine; ICD, International Statistical Classification of Diseases and Related Health Problems; iPAH, idiopathic pulmonary arterial hypertension.
